# Supplementary material
Source: Springer Nature journal article supplement (https://www.springermedizin.de/resource/supplementary/12913_2012_2497_MOESM2_ESM.pdf/9532020)
Supplement: MOESM2 [file 9532020]

## Ask

Assessment for SNAP risk factors as part of the routine assessment process

## Assess

Assessment of clients' readiness to change

## Advice

Provide feedback on SNAP risk factors and brief advice regarding recommendations

## Assist

Brief stage-matched counselling for lifestyle change over at least 2 visits

## Arrange

Refer to support services for more intensive intervention (especially high-risk clients)

Follow up progress at subsequent visits

## Stage-matched assistance for lifestyle change

| Stage                               | Approach                          |
|-------------------------------------|-----------------------------------|
| Pre-contemplation/<br>Contemplation | brief motivational interviewing   |
| Preparation/action:                 | goal setting /action planning     |
| Maintenance:                        | reinforcement, relapse prevention |
| Relapse:                            | relapse management                |
